# Supplementary material for: Critical Evaluation of Sinonasal Disease in 64 Adults with Primary Ciliary Dyskinesia
Source: PubMed Central journal article supplement (PMC6571605; doi:10.3390/jcm8050619), 2019-05-07
Supplement: jcm-08-00619-s001.pdf [file jcm-08-00619-s001.pdf]

**Table S1:** PCD diagnostic tests

|                                                                          | mean        | (± SD) |
|--------------------------------------------------------------------------|-------------|--------|
| Age at diagnosis of patients with SI and/or respiratory distress (years) | 16.5        | 15     |
| Age at diagnosis of other patients (years)                               | 30          | 14     |
|                                                                          | Patient (n) | %      |
| (NO) ( nL/min) (n = 45)*                                                 |             |        |
| n(NO) <77 nL/min                                                         | 38          | 84.4   |
| n(NO) ≥77 nL/min                                                         | 7           | 15.6   |
| Ciliary beat frequency (CBF) (n = 59)**                                  |             |        |
| Complete immotility                                                      | 40          | 67.9   |
| Low CBF <8Hz                                                             | 10          | 17     |
| CBF>8Hz                                                                  | 8           | 13.3   |
| Not evaluable                                                            | 1           | 1.8    |
| Ciliary ultrastructure (n = 62)                                          |             |        |
| Absence of outer dynein arms                                             | 17          | 27.4   |
| Absence of both dynein arms                                              | 14          | 22.6   |
| Central complex abnormalities                                            | 14          | 22.6   |
| Absence of inner dynein arms with disorganisation                        | 11          | 17.7   |
| No detectable defect***                                                  | 6           | 9.7    |
| Causal biallelic mutation                                                | 50          | 77     |

\* Cut- off determined by Jackson CL, Behan L, Collins SA, et al. Accuracy of diagnostic testing in primary ciliary dyskinesia. *The European Respiratory Journal*. 2016;47(3):837-848.

\*\* During the 20 year' study, technical modifications were introduced for the evaluation of ciliary beat frequency measurements (Papon J-F, Bassinet L, Cariou-Patron G, Zerah-Lancner F, Vojtek A-M, Blanchon S, et al. Quantitative analysis of ciliary beating in primary ciliary dyskinesia: A pilot study. *Orphanet J Rare Dis*. 2012;7:78). We considered 3 groups: Dyskinetic cilia with low CBF (<8Hz), dyskinetic cilia with normal CBF (>8Hz), or complete immotility when almost all cilia are immotile

\*\*\* All patients presented Kartagener syndrome

Abbreviations SI = Situs Inversus, SD = Standard Deviation, n(NO) = Nasal nitric oxide, CBF = Ciliary Beat Frequency
